# Supplementary material
Source: publisher site journal article supplement (https://www.spandidos-publications.com/3080/downloadSupplementary)

Figure S1. Telomerase activity in human gastric cancer cell lines.

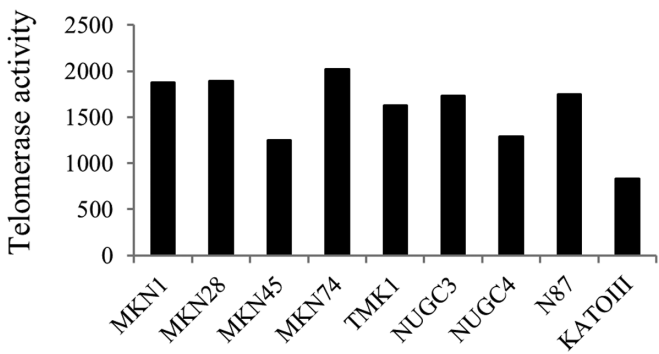

Figure S2. mRNA expression levels of hTERT in human gastric cancer cell lines. DF, dermal fibroblast; hTERT, human telomerase reverse transcriptase.

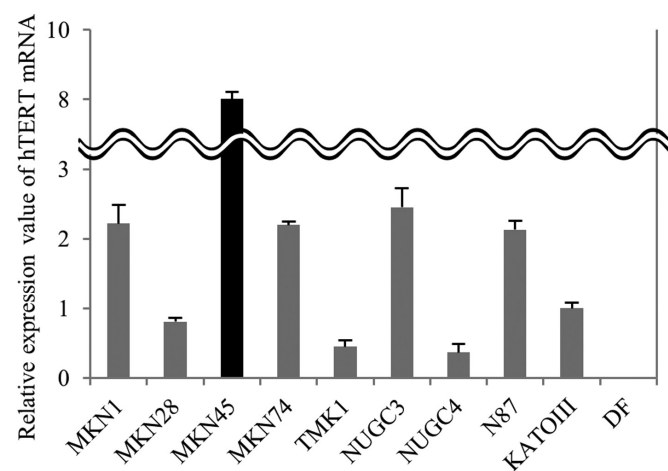

Supplement: Supplementary file 1 [file downloadSupplementary]
